# Supplementary material
Source: Research Square preprint supplement (doi:10.21203/rs.3.rs-9825177/v1)
Supplement: Supplementary file 1 [file da0fe580291909b8b7bdaf7e.docx]

**Table S1 List of ICD-10 and ATC codes used for definition of comorbidities and concomitant medicine.**

| **Comorbidity and Concomitant Medicine** | **ICD-10 code and ATC codes** |
| --- | --- |
| Asthma | DJ45, DJ46 |
| Diabetes | DE10-DE14 |
| Constipation | DK590A |
| Inflammatory Bowel Disease | DK50, DK51 |
| Chronic Kidney Disease | DI120, DZ992, DN391, DN02-DN08, DN11-DN16, DN18, DN19, DQ61, DM321B |
| Liver disease | DB15-DB19, DK71-DK77, DZ944, DD684C, DQ618A |
| Rheumatological Disease | DM00-DM09, DM13, DM30-DM34 |
| Malignancy | DC00-DC97, C44 |
| Drugs for Obstructive Airway Disease | MR03 |
| Antidiabetics | MA10 |
| Laxatives | MA06AD02, MA06AD11, MA06AD65 |
| Anti-inflammatory Drugs | MH02, ML01, ML04, MA07E, MN02BE01, AM01AE |

Abbreviations: ICD-10, International Classification of Diseases, 10th Revision codes; ATC, Anatomical Therapeutic Chemical.
